# Supplementary material for: Breast cancer outcome in relation to bone mineral density and bisphosphonate use: a sub-study of the DATA trial
Source: PubMed Central journal article supplement (PMC7103013; doi:10.1007/s10549-020-05567-9), 2020-03-02

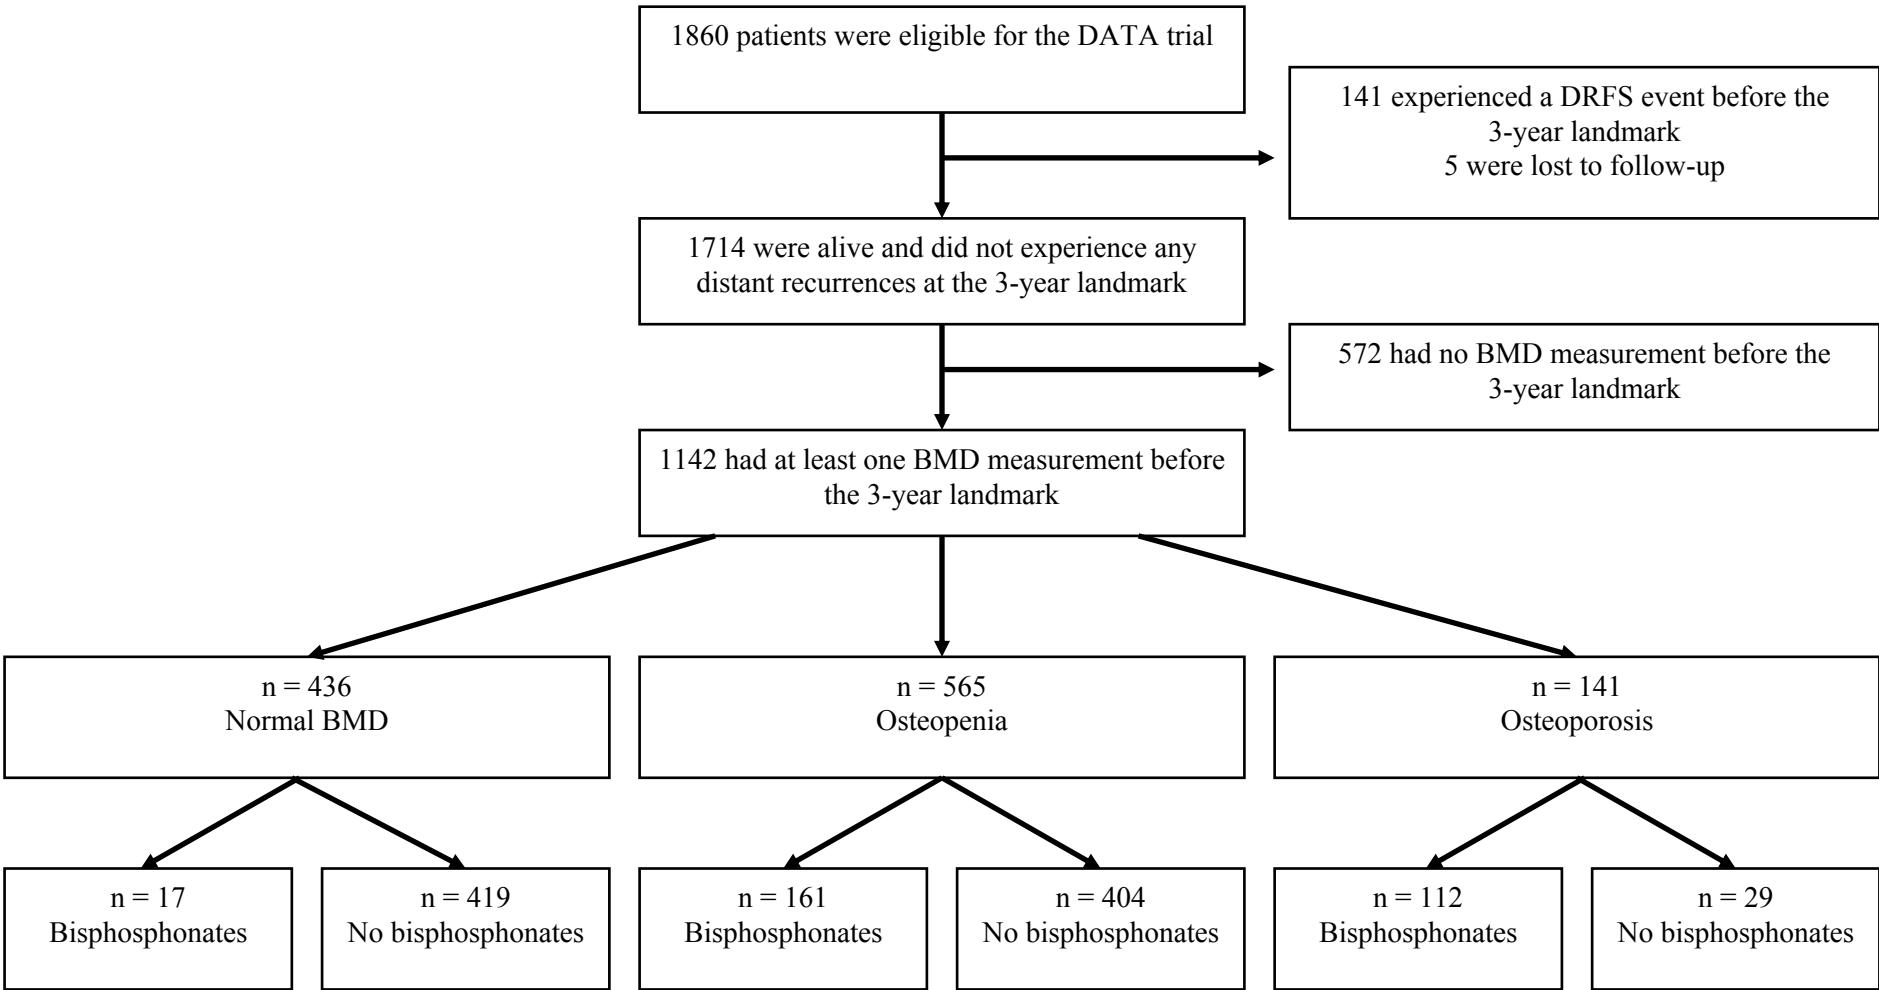

Supplement: 10549_2020_5567_MOESM2_ESM.pdf [file 10549_2020_5567_MOESM2_ESM.pdf]
